# Supplementary material
Source: PubMed Central journal article supplement (PMC3457386)
Supplement: AAC.00891-12_zac999101231so1.pdf [file AAC.00891-12_zac999101231so1.pdf]

## SUPPLEMENTAL MATERIAL

Existence of separate domains in lysin plyG for recognizing *Bacillus anthracis* spores  
and vegetative cells

Hang Yang, Dian-Bing Wang, Qihua Dong, Zhiping Zhang, Zongqiang Cui, Jiaoyu Deng,

Junping Yu, Xian-en Zhang,\* Hongping Wei,\*\*

*State Key Laboratory of Virology, Wuhan Institute of Virology, Chinese Academy of Sciences,  
Wuhan 430071, China.*

The **Supplemental material** contains the following content as shown in the below.

**Figure S1. The fluorescence images of time gradient stained *B. anthracis* cells.**

**Figure S2. Confocal analysis of *B. anthracis* vegetative cells stained with EP0.**

**Figure S3. Binding difference of the truncated proteins and the peptides to *B. anthracis* spores.**

**Figure S4. Kinetics of EP0, EP3 and EC5 interaction with *B. anthracis* spores.**

**Figure S5. The relative absorption of N21-AuNPs and bare AuNPs.**

**Table S1. *E. coli* strains, plasmids, peptides and oligonucleotides used in this work.**

**Table S2. Binding selectivity of the truncated proteins to *B. anthracis* vegetative cells.**

**Figure S1.** The fluorescence images of time gradient stained *B. anthracis* cells.

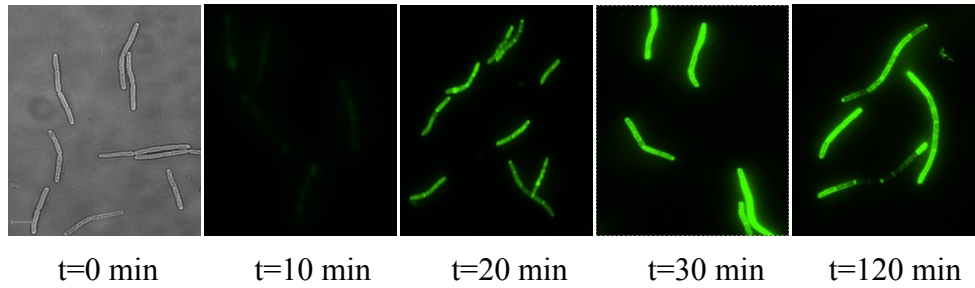

**Fig. S1.** The fluorescence images of time gradient stained *B. anthracis* cells. The *B. anthracis* cells were stained with EP0 at 37°C for different times ranging from 0 min to 120 min, and then the supernatant was analyzed after centrifuging at 12,000 g for 3 min. The concentration of *B. anthracis* cells was  $1.4 \times 10^6$  CFU/ml; The concentrations of EP9, EP3 and EP0 were 0.12  $\mu$ M; Bar size, 5  $\mu$ m.

**Figure S2. Confocal analysis of *B. anthracis* vegetative cells stained with EP0.**

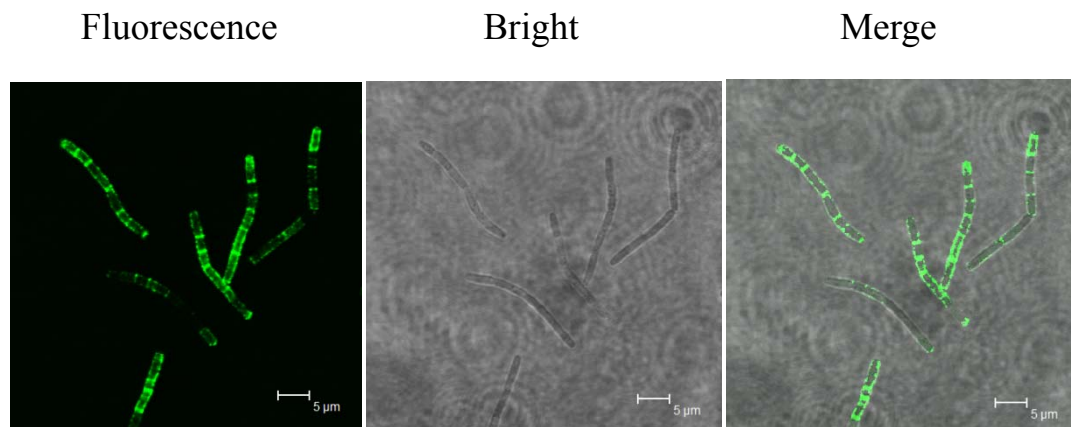

**Fig. S2.** Confocal analysis of *B. anthracis* vegetative cells stained with EP0. The cells conjugated with EP0 were washed three times with PBST buffer before imaging.

**Figure S3. Binding difference of the truncated proteins and the peptides to *B. anthracis* spores.**

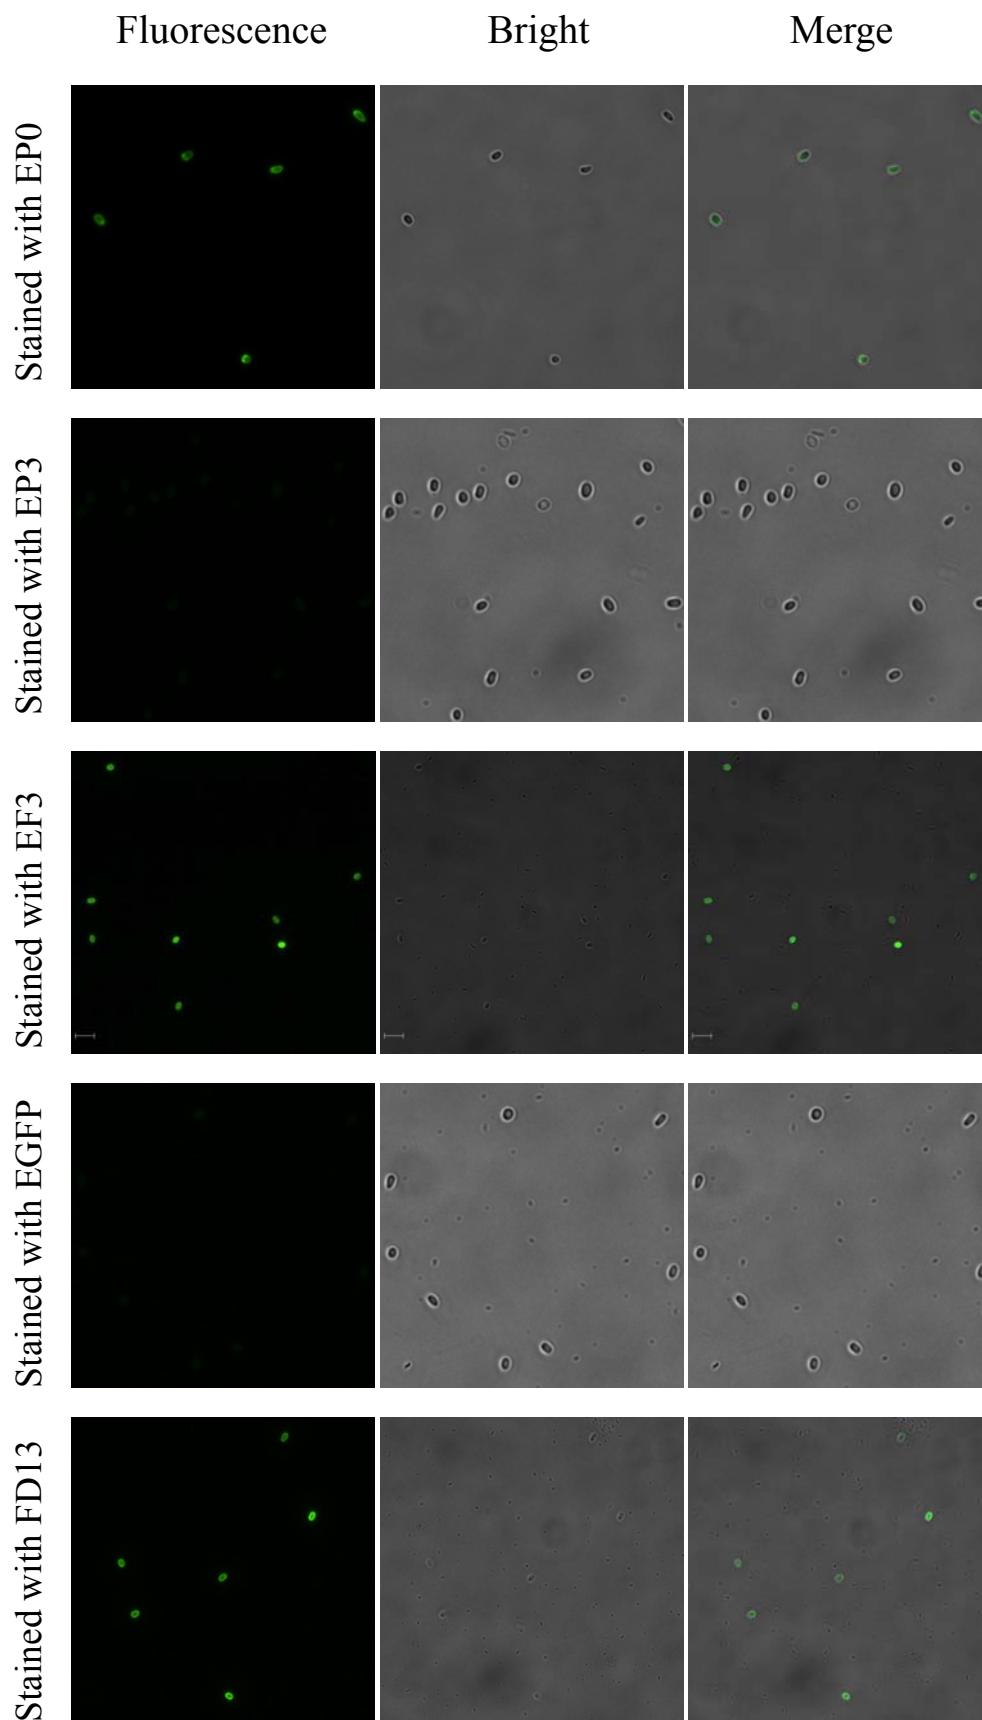

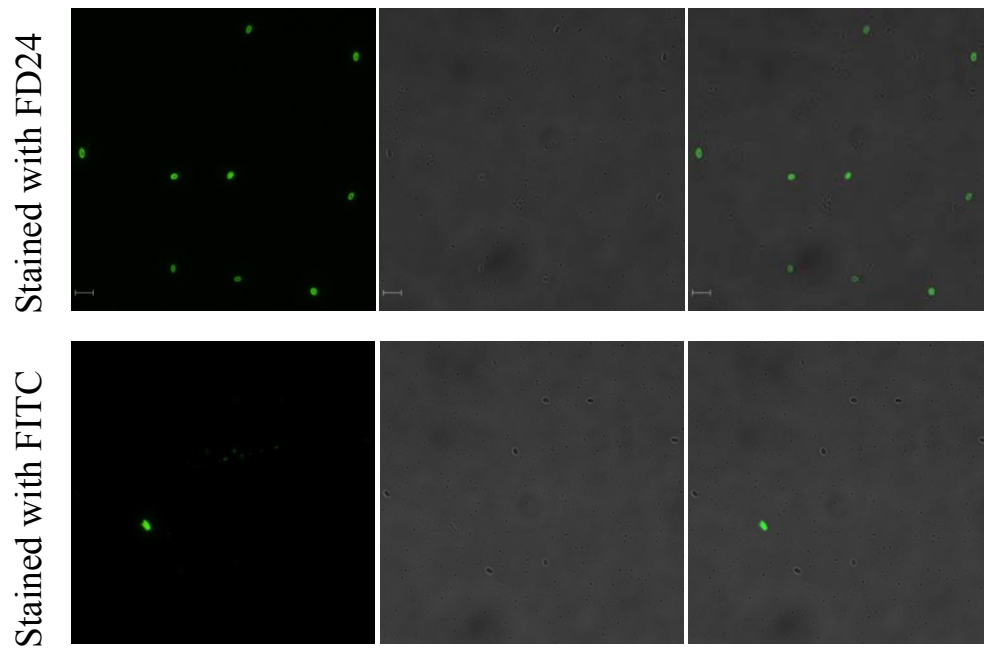

**Fig. S3.** Binding difference of the truncated proteins and the peptides to *B. anthracis* spores. All the images were captured under the same instrument conditions. Bar, 5  $\mu\text{m}$ .

Figure S4. Kinetics of EP0, EP3 and EC5 interaction with *B. anthracis* spores.

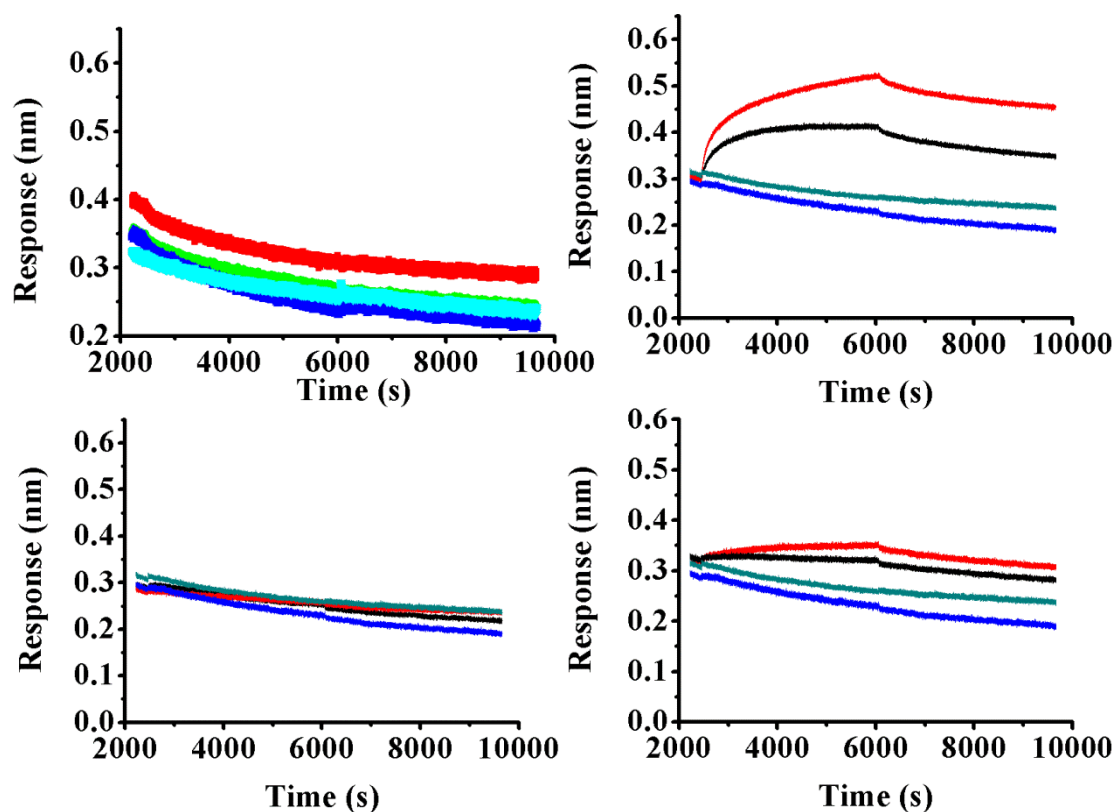

**Fig. S4.** Kinetics of EP0, EP3 and EC5 interaction with *B. anthracis* spores. (A) EC6 interaction with *B. mycooides* spores. Biotinylated *B. mycooides* spores were immobilized on the surface of the SA sensors. EC6 at concentrations of 674.6 nM (red line) and 337.3 nM (green line) were tested. (B) *B. anthracis* spores interaction with EC5 at a concentration of 681.2 nM (red line) and 340.6 nM (black line). (C) *B. anthracis* spores interaction with EP3 at a concentration of 776.3 nM (red line) and 388.1 nM (black line). (D) *B. anthracis* spores interaction with EP0 at a concentration of 611.1 nM (red line) and 305.6 nM (black line). EGFP (304.4 nM, pale blue line) and PBS (blue line) were used as the control and the blank in all the assays.

Figure S5. The relative absorption of N21-AuNPs and bare AuNPs.

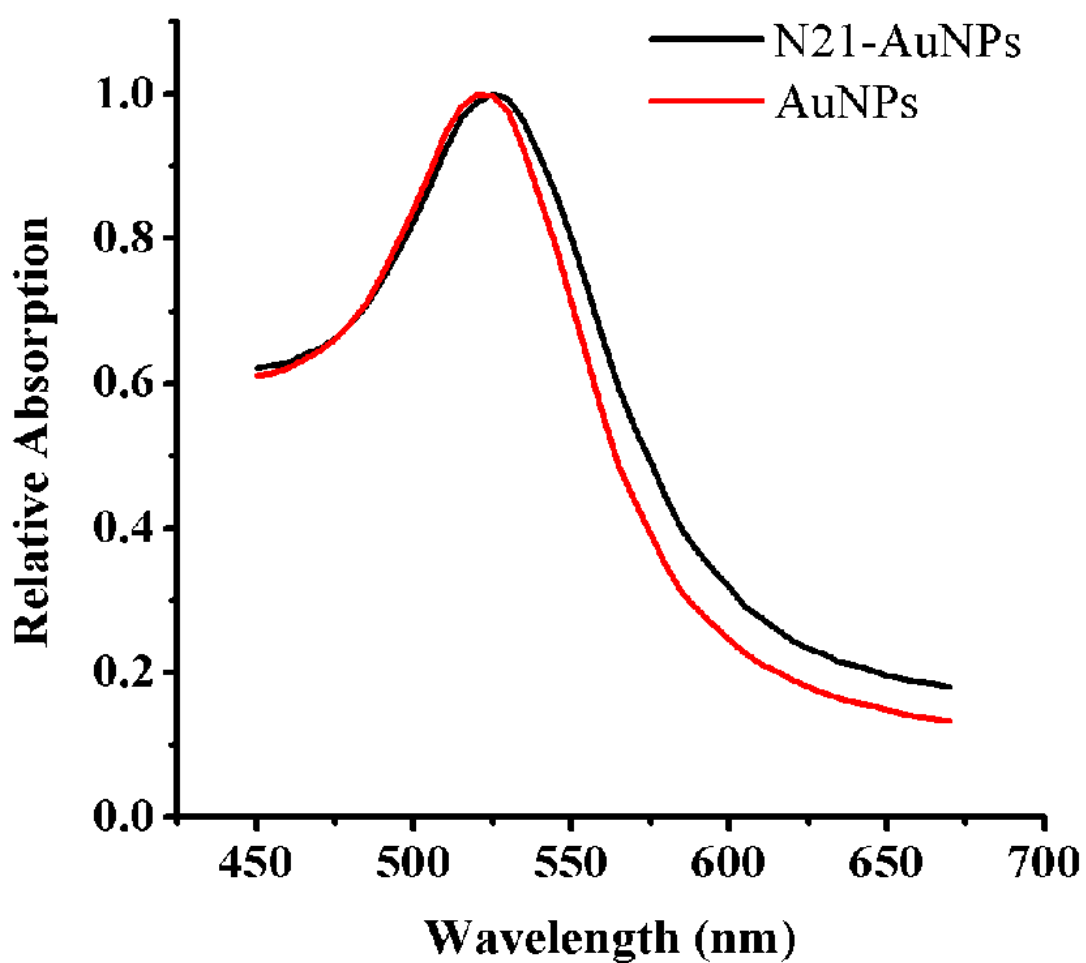

**Fig. S5.** The relative absorption of N21-AuNPs and bare AuNPs. The absorption of N21-AuNPs and bare AuNPs were monitored by a Synergy H1 spectrophotometer (BioTek, USA), the data was shown after normalization.

**Table S1. *E. coli* strains, plasmids, peptides and oligonucleotides used in this work**

| Strain/plasmid         | Relevant characteristics                                                                                                  | Source     |
|------------------------|---------------------------------------------------------------------------------------------------------------------------|------------|
| <i>E. coli</i> strain  |                                                                                                                           |            |
| BL21(DE3)              | <i>ompT hsdS B</i> (rB <sup>-</sup> mB <sup>-</sup> ) (λ DE3)                                                             | Invitrogen |
| DH5α                   | Host strain for pUC57-plyG                                                                                                | Songon     |
| plasmid                |                                                                                                                           |            |
| pUC57                  | Cloning vector for chemical synthetic plyG                                                                                | Songon     |
| pUC57-plyG             | Amp <sup>R</sup> plyG gene cassette vector                                                                                | Songon     |
| pEGFP-C1               | Amp <sup>R</sup> <i>egfp</i> cassette vector                                                                              | Invitrogen |
| pET28a(+)              | Kan <sup>R</sup> expressing vector with a T7 promoter                                                                     | Novagen    |
| pBAD24                 | Amp <sup>R</sup> expressing vector with a BAD promoter                                                                    | (1)        |
| pB-plyG                | plyG cloned into the <i>EcoRI</i> and <i>NcoI</i> sites of pBAD24 with primers plyG-F and plyG-R.                         | this work  |
| pET-GFP                | pEGFP-C1 <i>egfp</i> gene cloned into the <i>NdeI</i> and <i>BamHI</i> sites of pET28(+) with primers GFP-F and GFP-R.    | this work  |
| pET-EP9                | CBD90 <sup>a</sup> from plyG cloned into the <i>EcoRI</i> and <i>XhoI</i> sites of pET-GFP with primers P90-F and CBD-R   | this work  |
| pET-EP0                | CBD106 <sup>a</sup> from plyG cloned into the <i>EcoRI</i> and <i>XhoI</i> sites of pET-GFP with primers P106-F and CBD-R | this work  |
| pET-EP3                | CBD136 <sup>a</sup> from plyG cloned into the <i>EcoRI</i> and <i>XhoI</i> sites of pET-GFP with primers P136-F and CBD-R | this work  |
| pET-EC3                | The EC3-F <sup>b</sup> and EC3-R annealed and cloned into the <i>EcoRI</i> and <i>XhoI</i> sites of pET-GFP               | this work  |
| pET-EC5                | The fragment from 106 to 155 of plyG amplified and cloned into the <i>EcoRI</i> and <i>XhoI</i> sites of pET-GFP          | this work  |
| pET-EC6                | The fragment from 106 to 165 of plyG amplified and cloned into the <i>EcoRI</i> and <i>XhoI</i> sites of pET-GFP          | this work  |
| pET-EC8                | The fragment from 106 to 189 of plyG amplified and cloned into the <i>EcoRI</i> and <i>XhoI</i> sites of pET-GFP          | this work  |
| pET-EG1                | plyG amplified and cloned into the <i>EcoRI</i> and <i>XhoI</i> sites of pET-GFP                                          | this work  |
| pET-EF3                | The fragment from 125 to 145 of plyG amplified and cloned into the <i>EcoRI</i> and <i>XhoI</i> sites of pET-GFP          | this work  |
| <b>peptide</b>         |                                                                                                                           |            |
|                        | <b>Sequence (N–C)</b>                                                                                                     |            |
| FD13 <sup>c</sup>      | DNAVDVVRQLMSMYNIPIENVRTHQSWSGKYCPHRMLAEG                                                                                  |            |
| FD24 <sup>c</sup>      | NIPIENVRTHQSWSGKYCPHRMLAEGRWGAFIQKVK                                                                                      |            |
| FD23 <sup>c</sup>      | NVRTHQSWSGKYCPHRMLAEG                                                                                                     |            |
| N21                    | CSGSG NVRTHQSWSGKYCPHRMLAEG                                                                                               |            |
| <b>Oligonucleotide</b> |                                                                                                                           |            |
|                        | <b>Sequence (5'–3')</b>                                                                                                   |            |
| P90-F                  | AAAAGAATTCGAAATCTGTTATTCAAAATCAGGAG                                                                                       |            |
| P106-F                 | AAAAGAATTCGATAATGCTGTTGATGTTGTACG                                                                                         |            |
| P136-F                 | AAAAGAATTCTATTGTCCGCATAGAATGTTAGCTG                                                                                       |            |



---

|        |                                                                                                                                                |
|--------|------------------------------------------------------------------------------------------------------------------------------------------------|
| plyG-F | AAAAGAATTCATGGAAATCCAAAAAAAATTAG                                                                                                               |
| PlyG-R | AAACCATGGTTATTTAACTTCATACCACCAAC                                                                                                               |
| CBD-R  | AAACTCGAGTTTAACTTCATACCACCAACC                                                                                                                 |
| GFP-F  | AATCCATATGGTGAGCAAGGGCGAG                                                                                                                      |
| GFP-R  | GGCCGGATCCCTTGTACAGCTCGTC                                                                                                                      |
| EC-F   | TAAAGAATTCGATAATGCTGTTGATGTTG                                                                                                                  |
| EC5-R  | AAATCTCGAGTTACTTAACTTCTGAATG                                                                                                                   |
| EC6-R  | TAATCTCGAGTTATGTTGGTGAAGTAGTCG                                                                                                                 |
| EC8-R  | ATGTCTCGAGTTATGACGTTAATGCTCC                                                                                                                   |
| EG1-F  | AAAGAATTCGAAATCCAAAAAAAATTAG                                                                                                                   |
| EG1-R  | AAACTCGAGTTATTTAACTTCATACCACC                                                                                                                  |
| EC3-F  | AATTCGGTGGGGGAGGATCAGGTGGGGGAGGATCAGATAAT<br>GCTGTTGATGTTGTACGACAACCTTATGTCTATGTACAATATC<br>CGATTGAAAATGTTTCGAACTCATCAATCCTGGTCAGGTAAAT<br>AAC |
| EC3-R  | TCGAGTTATTTACCTGACCAGGATTGATGAGTTCGAACATTTT<br>CAATCGGAATATTGTACATAGACATAAGTTGTCGTACAACATC<br>AACAGCATTATCTGATCCTCCCCACCTGATCCTCCCCACC<br>G    |

---

<sup>a</sup>CBD90, <sup>a</sup>CBD106, <sup>a</sup>CBD136: the arabic numbers 90, 106 and 136 represent the sites where the recombinant proteins were truncated in the amino sequence of plyG.

<sup>b</sup>EC3-F: a chemical synthesized oligonucleotide which contains a (G4S)<sub>2</sub> encoding sequences tandem with a nucleotide sequence from site 316 to 405 of plyG.

<sup>c</sup>FD13, <sup>c</sup>FD24 and <sup>c</sup>FD23: a N-terminal FITC modification were exploited.

## Reference

1. Li H, Zhang X, Bi L, He J, & Jiang T (2011) Determination of the crystal structure and active residues of FabV, the enoyl-ACP reductase from *Xanthomonas oryzae*. (Translated from eng) *PLoS One* 6(10):e26743 (in eng).

**Table S2. Binding selectivity of the truncated proteins to *B. anthracis* vegetative cells.**

| isolate or strain       | EP9 | EP0 | EP3 | Source or reference |
|-------------------------|-----|-----|-----|---------------------|
| <i>B. anthracis</i>     |     |     |     |                     |
| A16                     | +   | +   | +   | Lab collection      |
| <i>B. cereus</i>        |     |     |     |                     |
| NC7401/2455             | -   | -   | -   | Lab collection      |
| AND 1315R               | -   | -   | -   | Lab collection      |
| 4810/72                 | -   | -   | -   | Lab collection      |
| ATCC 33018R             | -   | -   | -   | Lab collection      |
| IS 195                  | -   | -   | -   | Lab collection      |
| <i>B. thuringiensis</i> |     |     |     |                     |
| sylvestriensis H61      | -   | -   | -   | Lab collection      |
| bolivia H63             | -   | -   | -   | Lab collection      |
| inensis H70             | -   | -   | -   | Lab collection      |
| tenebrionis 1765        | -   | -   | -   | Lab collection      |
| pulsiensis H65          | -   | -   | -   | Lab collection      |
| BMB 171                 | -   | -   | -   | Lab collection      |
| GBJ 001                 | -   | -   | -   | Lab collection      |
| <i>B. subtilis</i>      |     |     |     |                     |
| subsp.                  | -   | -   | -   | Lab collection      |
| <i>B. mycoides</i>      |     |     |     |                     |
| subsp.                  | -   | -   | -   | Lab collection      |
| <i>B. licheniformis</i> |     |     |     |                     |
| subsp.                  | -   | -   | -   | Lab collection      |
| <i>B. pumilus</i>       |     |     |     |                     |
| subsp.                  | -   | -   | -   | Lab collection      |
| <i>X. oryzae</i>        |     |     |     |                     |
| ks-1-21                 | -   | -   | -   | Lab collection      |
| <i>P. aeruginosa</i>    |     |     |     |                     |
| PA01                    | -   | -   | -   | Lab collection      |
| <i>E. coli</i>          |     |     |     |                     |
| BL21(DE3)               | -   | -   | -   | Lab collection      |
